# Supplementary material for: Dipeptide concave nanospheres based on interfacially controlled self-assembly: from crescent to solid
Source: Royal Society of Chemistry journal article supplement (doi:10.1039/c6cp06150h), 2016-01-01
Supplement: c6cp06150h1.pdf [file c6cp06150h1.pdf]

## **Dipeptide Concave Nanospheres Based on Interfacially Controlled Self-Assembly: From Crescent to Solid**

Juan Wang,<sup>a</sup> Guizhi Shen,<sup>a</sup> Kai Ma,<sup>b</sup> Tifeng Jiao,<sup>b</sup> Kai Liu<sup>a,c</sup> and Xuehai Yan<sup>\*,a,d</sup>

<sup>a</sup> State Key Laboratory of Biochemical Engineering, Institute of Process Engineering,  
Chinese Academy of Sciences, Beijing 100190, P.R. China

<sup>b</sup> Hebei Key Laboratory of Applied Chemistry, School of Environmental and Yanshan  
University, Qinhuangdao 066004, P. R. China

<sup>c</sup> University of Chinese Academy of Sciences, Beijing 100049, P.R. China

<sup>d</sup> Center for Mesoscience, Institute of Process Engineering, Chinese Academy of  
Sciences, Beijing 100190, P.R. China

\* Address correspondence to Email: [yanxh@ipe.ac.cn](mailto:yanxh@ipe.ac.cn)

Homepage: <http://www.yan-assembly.org/>

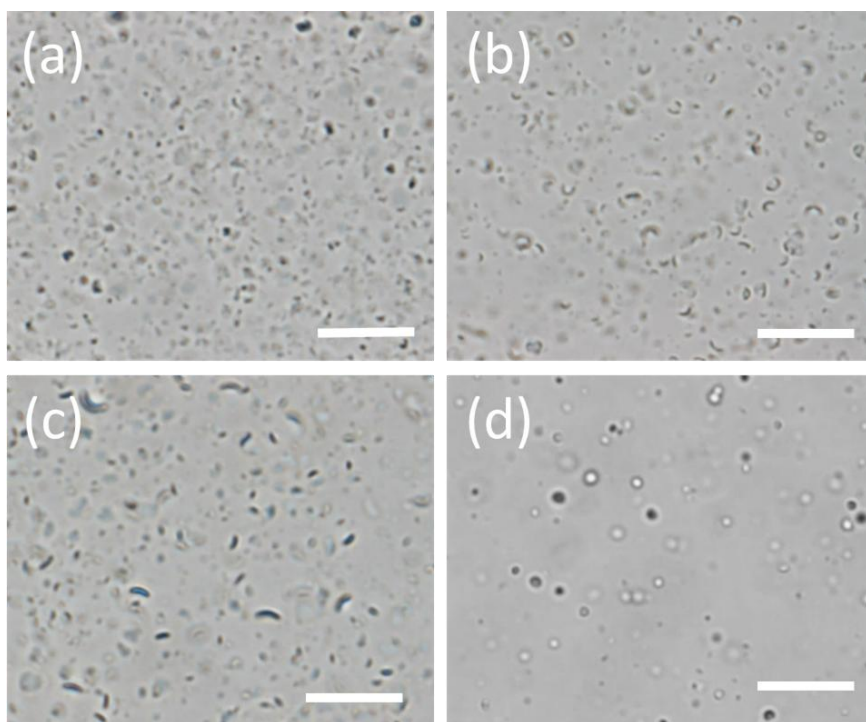

**Fig. S1** Optical microscope images of concave nanospheres at (a) 20 min, (b) 40 min, (c) 4 h, and (d) 24 h. Scale bar is 10  $\mu\text{m}$ .

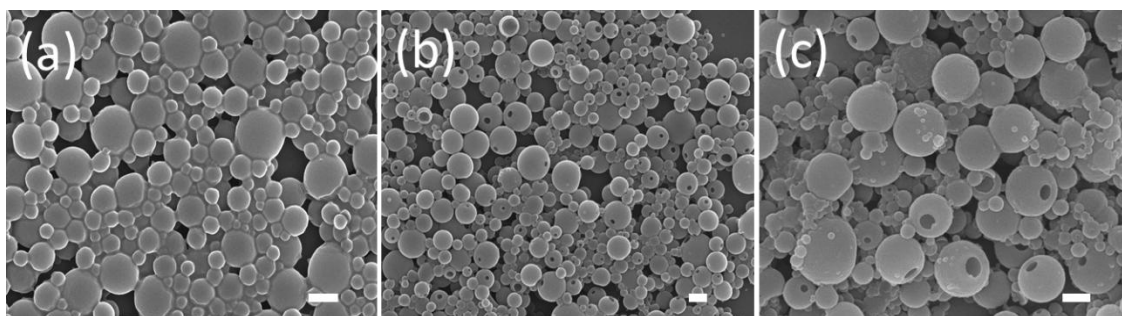

**Fig. S2** SEM images of concave nanospheres with different toluene content: a) 1%, b) 5% c) 10%. Scale bar is 500 nm.

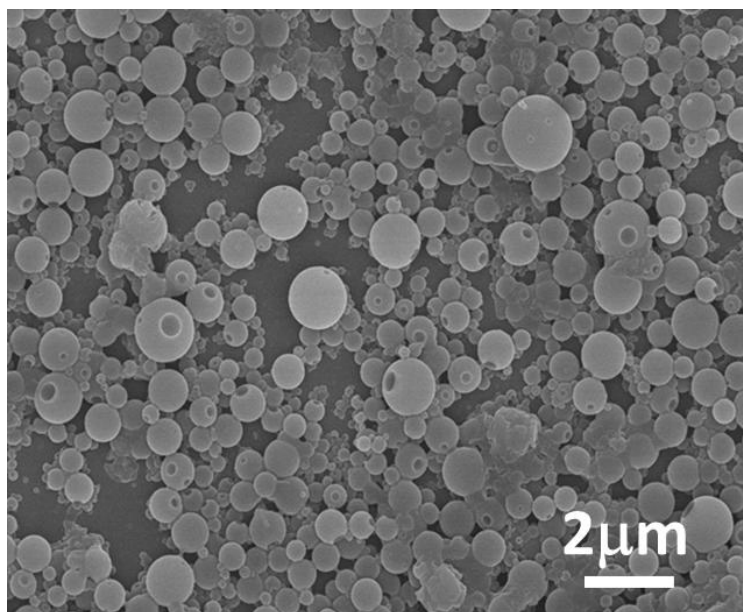

**Fig. S3** SEM images of concave nanospheres prepared by dichloromethane as the oil phase of the emulsions.

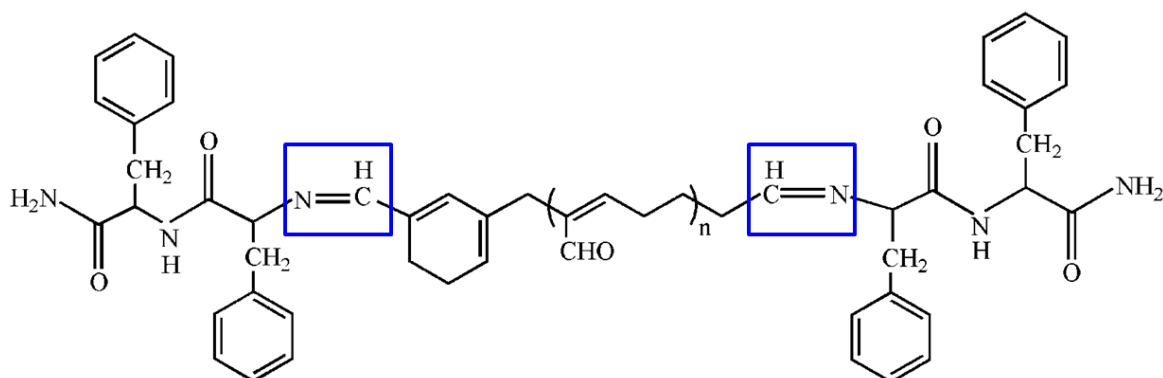

**Fig. S4** The chemical structures of bola-dipeptides FF-GA<sub>n</sub>-FF through Schiff base covalent bond -HC=N- in blue frame.<sup>1</sup>

## Reference

- 1 H. Zhang, J. B. Fei, X. H. Yan, A. H. Wang and J. B. Li, *Adv. Funct. Mater.*, 2015, **25**, 1193-1204.
